# Supplementary material for: Potentials and Challenges in Students’ Meaning-Making via Sign Systems
Source: MDPI journal article supplement (doi:10.3390/mti6020009), 2022-01-21
Supplement: s1 [file s1]

Observation schedule

| Student X | Technologies: | Technologies functional properties: | Technologies semiotic properties: | Modes of representation: | Activities: | Additional remarks: |
|-----------|---------------|-------------------------------------|-----------------------------------|--------------------------|-------------|---------------------|
| Lesson:   |               |                                     |                                   |                          |             |                     |
| Notes:    |               |                                     |                                   |                          |             |                     |
|           |               |                                     |                                   |                          |             |                     |
|           |               |                                     |                                   |                          |             |                     |
|           |               |                                     |                                   |                          |             |                     |
| Lesson:   |               |                                     |                                   |                          |             |                     |
| Notes:    |               |                                     |                                   |                          |             |                     |
|           |               |                                     |                                   |                          |             |                     |
|           |               |                                     |                                   |                          |             |                     |
|           |               |                                     |                                   |                          |             |                     |
