# Supplementary material for: Potentials and Challenges in Students’ Meaning-Making via Sign Systems
Source: MDPI journal article supplement (doi:10.3390/mti6020009), 2022-01-21
Supplement: s1 [file s1]

| Grouped codes              |                                                                                                                                                                    |                                                                                                                                                                                                                                                   |                                                                                                                                                         |                                               |                                           |                                           |                                           |
|----------------------------|--------------------------------------------------------------------------------------------------------------------------------------------------------------------|---------------------------------------------------------------------------------------------------------------------------------------------------------------------------------------------------------------------------------------------------|---------------------------------------------------------------------------------------------------------------------------------------------------------|-----------------------------------------------|-------------------------------------------|-------------------------------------------|-------------------------------------------|
| Code name:                 | Definition:                                                                                                                                                        | Keywords:                                                                                                                                                                                                                                         | Example line:                                                                                                                                           | Frequency (N) of rows in the dataset (= 680): | Kappa (K > .9) - level of agreement H1/AC | Kappa (K > .9) - level of agreement H1/H2 | Kappa (K > .9) - level of agreement H2/AC |
| <i>Technology.Software</i> | Application software that directs the computer to execute commands given by the user. The definition includes programs that processes data for a user <sup>1</sup> | Google, Spotify, Slojdportfolio, Website, Bingel, Internet, NE.se,Wikipedia, Classroomscreen, Gmail, Browser, Widgit, Seterra, Movie, Studi, Videoclip, Youtube, Technology, App-wrote, Film, Padlet, Whatsapp, Powerpoint, Notes-document, Vimeo | “I first went into Google document and wrote, and I thought I used it pretty well I write a lot, I used a tablet. I went to Spotify, Google Classroom.” | 190                                           | .99**                                     | .97**                                     | .97*                                      |

<sup>1</sup> <https://www.britannica.com/technology/software>

|                                    |                                                                                          |                                                                                                                                                                                                                                                                                                                                                                                                                                                                                                           |                                                                                                                                                                                                                 |                                          |                                        |                                        |                                        |
|------------------------------------|------------------------------------------------------------------------------------------|-----------------------------------------------------------------------------------------------------------------------------------------------------------------------------------------------------------------------------------------------------------------------------------------------------------------------------------------------------------------------------------------------------------------------------------------------------------------------------------------------------------|-----------------------------------------------------------------------------------------------------------------------------------------------------------------------------------------------------------------|------------------------------------------|----------------------------------------|----------------------------------------|----------------------------------------|
| <i>Actions</i>                     | Grouped code for primary, secondary, and tertiary levels of mediation in use of DVUIs    | Access, type, orientation, tap, confirm, click, retrieve, project, navigate, exit, activate, open, press, play-in, stir, drag, shut, control, download, turn, log in, commit, search, view, touch, add, inscribe, position, swipe, adjust, leave, verify, delimit, time, share, receive, hover, seek, discover, direct, scroll, display, submit, terminate, shift, select, minimize, switch, sign up, insert, enclose, separate, distance, erase, appl, correct, frame, guide, distinguish, replace, zoom | “Student access Google apps by clicking on the dotted button, and by hovering on the apps icons in Google apps with the mouse pad and cursor and the Gmail gets defined. The student access Gmail by clicking.” | 355                                      | .99**                                  | .99**                                  | .99**                                  |
| <i>Representation.of.functions</i> | Grouped code for all symbolically and physically manifested representations of functions | Horizontal, virtual, password, button, home, symbol, badge, recent app, window, plus, pop-up, rename, field, record, prediction, toolbar, underline, center, shortcut, clock, circle, cursor, hourglass, icon, box, slide bar, link, post-it, notice-board, notification, page, message, mouse, mouse pad, keyboard, real, hotkey, tangent                                                                                                                                                                | “Yes, because I know where all the letter tangents are like, I can just go in ...”                                                                                                                              | 265                                      | .98 **                                 | .97**                                  | .95*                                   |
| <i>Semiotic.Properties</i>         | Semiotic properties used in modes of representation                                      | Picture, passcode, blotch, emoji, headline, space, suggestion, small, large, visibly, capital, letter, near, sound, section, moving, brightness, white, green, shade, color, dark, nuance, big, size, tight, pink, black, proximity, font, layout, number, yellow, bold, superimposed, bullet, template                                                                                                                                                                                                   | “Mmmm, maybe a bigger monitor. It's a pretty small size on them [means Laptop] but you can use them but a little bigger then, so you distinguish a little more.”                                                | 107                                      | .97**                                  | .96*                                   | .99**                                  |
| <i>Modes.of.Representation</i>     | Meaning-making conveyed by students into modes of representation                         | Writ, speech, gaze, text, spell, voice, talk, describe. hand, answer, inquire, conversation, oral, move                                                                                                                                                                                                                                                                                                                                                                                                   | “The result was quite good. We could have had more text [in PowerPoint] and a little more mixed information.”                                                                                                   | 209                                      | .98**                                  | .99**                                  | .99**                                  |
| <i>Activities</i>                  | All activities related to learning                                                       | Subject, Swedish, lesson, purpose, explain, instruct, introduction, assignment, sloyd, science, math, English, music, geography, mountain, map, Europe, task, topic, attention, question, information, weather, sun, meteorology, physical education, story, watch, listen, individual, compose, read, quiet, practice, evaluate, discuss, group, creating, tell, reason, each other, collaboration                                                                                                       | “It felt like it was the same information in the text that we write.”                                                                                                                                           | 229                                      | .96**                                  | .97**                                  | .99**                                  |
| Refined codes                      |                                                                                          |                                                                                                                                                                                                                                                                                                                                                                                                                                                                                                           |                                                                                                                                                                                                                 |                                          |                                        |                                        |                                        |
| Category/code name:                | Definition:                                                                              | Keywords:                                                                                                                                                                                                                                                                                                                                                                                                                                                                                                 | Example line:                                                                                                                                                                                                   | Frequency (N) in the dataset (TN = 494): | Kappa (k) - level of agreement : H1/AC | Kappa (k) - level of agreement : H1/H2 | Kappa (k) - level of agreement : H2/AC |

| <b>Technology software</b>               | <b>Software categorized according to the foregrounded modality in use.</b>                                                  |                                                                                                                                                                                                                        |                                                                                                                                                                                                                                                                               |     |       |       |       |
|------------------------------------------|-----------------------------------------------------------------------------------------------------------------------------|------------------------------------------------------------------------------------------------------------------------------------------------------------------------------------------------------------------------|-------------------------------------------------------------------------------------------------------------------------------------------------------------------------------------------------------------------------------------------------------------------------------|-----|-------|-------|-------|
| <i>Software.Multimodal</i>               | Software where several modalities are foregrounded in use                                                                   | Slojdportfolio, Bingel, Classroomscreen, Studi, Whatsapp                                                                                                                                                               | “We use Bingel.se quite often, because it is good, it is in Swedish and Math, everyone thinks it is good because you get PP so you can buy clothes and hair and accessories.”                                                                                                 | 41  | .99** | .99** | .99** |
| <i>Software.Visual</i>                   | Software where mainly the visual modality is foregrounded in use                                                            | Widgit, film, Powerpoint, Seterra, videoclip, movie, Youtube, Vimeo                                                                                                                                                    | “As for example in Seterra.com - it can be easier to do it in the laptop because then you see more than in the book.”                                                                                                                                                         | 46  | .99** | .99** | .99** |
| <i>Software.Other</i>                    | Software where there is no direct tie to any foregrounded modality in use                                                   | Technology, website, internet, browser                                                                                                                                                                                 | “So, the result was good because you can write things down and so on. And I like technology and those subjects and stuff.”                                                                                                                                                    | 15  | .99** | .99** | .99** |
| <i>Software.Linguistic</i>               | Software where mainly the linguistic modality is foregrounded in use                                                        | Padlet, Google, document, App-wrote, Notes-document, NE.se, Wikipedia, Gmail                                                                                                                                           | In the beginning then we would open a document [Google documents] and do what she showed now and in the middle of the lesson then you have written a bit and then at the end you were about half done so I have a hard clarifying thing you only finish first in the lesson.” | 78  | .99** | .99** | .99** |
| <i>Software.Repository</i>               | Repository software such as learning management systems                                                                     | Google classroom, Google apps                                                                                                                                                                                          | “Google Apps, right? That was the first step, right? Or you had a recent apps that you used where you tapped in right away, right? Yes.”                                                                                                                                      | 28  | .99** | .96*  | .96*  |
| <b>Functional properties</b>             | <b>Functional properties categorized according to the taxonomy (Wartofsky, 1973).</b>                                       |                                                                                                                                                                                                                        |                                                                                                                                                                                                                                                                               |     |       |       |       |
| <i>Functional. Properties. Primary</i>   | Functions on the DVUIs that are mediated through the primary level of actions such as preforming work and production.       | Access, type, orientation, tap, confirm, click, retrieve, project, navigate, exit, activate, open, press, play-in, stir, drag, shut, control, download, turn, log in, commit, search.                                  | “That's what happens with the laptop then, for example Seterra.com, and there you have to click and then you get a result [pop-up] and how much time it took.”                                                                                                                | 205 | .99** | .99** | .99** |
| <i>Functional. Properties. Secondary</i> | Functions on the DVUIs that are mediated through the secondary mediating level of action such as organizing and structuring | View, touch, add, inscribe, position, swipe, adjust, leave, verify, delimit, time, share, receive, hover, seek, discover, direct, scroll, display, submit, terminate, shift, select, minimize, switch, sign up, insert | “Then I access to the XX- unit and check what I am going to write and then I just tap there again and swipe to Notes and write.”                                                                                                                                              | 156 | .99** | .99** | .99** |

|                                          |                                                                                                                            |                                                                                                                                                                                                                                                                                         |                                                                                                                                                                                                                                                    |     |        |       |        |
|------------------------------------------|----------------------------------------------------------------------------------------------------------------------------|-----------------------------------------------------------------------------------------------------------------------------------------------------------------------------------------------------------------------------------------------------------------------------------------|----------------------------------------------------------------------------------------------------------------------------------------------------------------------------------------------------------------------------------------------------|-----|--------|-------|--------|
| <b>Functional. Properties. Tertiary</b>  | Functions on the DVUIs that are mediated through the tertiary level of higher order actions such as learning               | Enclose, separate, distance, erase, appl, correct, frame, guide, distinguish, replace, zoom                                                                                                                                                                                             | “Because you e.g., asked how I got it was mostly to change, because I can play-in things that happen on the tablet Ehm...and then I can resolve things, by correcting where it is red underlined or at the virtual keyboard there a little above.” | 49  | .99**  | 0.96* | 0.96*  |
| <b>Representation of functions (RoF)</b> | <b>Representation of functions categorized from their foregrounded meaning when integrated in actions.</b>                 |                                                                                                                                                                                                                                                                                         |                                                                                                                                                                                                                                                    |     |        |       |        |
| <b>RoF.Symbolic</b>                      | Representation of functions that are symbolically manifested on DVUIs                                                      | Virtual, horizontal, password, button, home, symbol, badge, recent app, window, plus, pop-up, rename, field, record, prediction, toolbar, page, message, underline, center, shortcut, clock, circle, cursor, hourglass, icon, box, slide bar, link, post-it, notice-board, notification | “Yes, for example then in the Google Classroom there are boxes then as it says and if it had not said anything then it would have been quite difficult to know what to go into.”                                                                   | 235 | 0.98** | .99** | .97**  |
| <b>RoF.Physical</b>                      | Representations of functions that are physically manifested on DVUIs                                                       | Mouse, mouse pad, keyboard, real, hotkey, tangent, horizontal                                                                                                                                                                                                                           | “So, mouse pad and keyboard and the programs it is important that you see what it says.”                                                                                                                                                           | 45  | .99**  | 0.96* | 0.96** |
| <b>RoF Symbolic. Overviews</b>           | Overviews (e.g., folders, centers) that direct, and are an intermission or gateway to access other pages, windows etcetera | Badge, page, recent, app, op-up, center, shortcut                                                                                                                                                                                                                                       | “Assignments and exercise are organized in the Google classroom through different designation badges and window tabs.”                                                                                                                             | 69  | .99**  | .99** | .99**  |
| <b>RoF.Symbolic.Entries</b>              | Entries (e.g., a message, an email) that facilitates actions on a response                                                 | Message, toolbar, underline, link, horizontal                                                                                                                                                                                                                                           | “Because occasionally when you spell it wrong, it becomes red underlined underneath.”                                                                                                                                                              | 33  | .99**  | .92*  | .92*   |
| <b>RoF.Symbolic.Buttons</b>              | Buttons (e.g., a virtual push button on the DVUIs) that facility the act of pressing, tapping, clicking                    | Virtual, plus, home, button, symbol, slide bar, circle, icon                                                                                                                                                                                                                            | “A button that you press to submit and then you cannot adjust what you have submitted so that the teacher can view and so on. It is good.”                                                                                                         | 118 | .99**  | .99** | .99**  |
| <b>RoF.Symbolic.Guiding</b>              | Functions that are directly coupled to further actions                                                                     | Prediction, clock, cursor, hourglass                                                                                                                                                                                                                                                    | “I mostly use the predicting thing [word prediction]. Yes, e.g., to that star thing, if you wanted to explain what it looked like.”                                                                                                                | 36  | .94*   | .92*  | .99**  |
| <b>RoF.Symbolic.Lists/notes</b>          | Functions where lists are generated or created digitally                                                                   | Record, post-it, notice-board, notification                                                                                                                                                                                                                                             | “We usually mostly use it in mathematics and when we are going to sign up for the help record, then you sign up your name then the teacher comes and helps us in that order.”                                                                      | 9   | .99**  | .99** | .99**  |

## Codebook

|                                      |                                                                                                       |                                                                                                                                                                                                                                              |                                                                                                                                                                                                           |     |       |       |       |
|--------------------------------------|-------------------------------------------------------------------------------------------------------|----------------------------------------------------------------------------------------------------------------------------------------------------------------------------------------------------------------------------------------------|-----------------------------------------------------------------------------------------------------------------------------------------------------------------------------------------------------------|-----|-------|-------|-------|
| <i>RoF.Symbolic.Lines</i>            | Functions for typing such as a search field or a password line                                        | Password, rename, field, box                                                                                                                                                                                                                 | “If you go in like on Google and then there is the quest box there, there is a microphone there.”                                                                                                         | 17  | .99** | .99** | .99** |
| <b>Modes of representation (MoR)</b> | <b>Modes of representation categorized from their foregrounded modalities in representation.</b>      |                                                                                                                                                                                                                                              |                                                                                                                                                                                                           |     |       |       |       |
| <i>MoR.Linguistic</i>                | MoR where linguistic modes are foregrounded such as writing, texts, spelling, and descriptions        | Writ, text, spell, descri.                                                                                                                                                                                                                   | “In Swedish you would discuss and write a text and it is quite good in the [Google] classroom because then you can submit and share and so in case you need or so.”                                       | 174 | .99** | .97** | .97*  |
| <i>MoR.Auditory</i>                  | MoR where auditory modes are foregrounded in using the oral apparatus                                 | Voice, Talk, Speech, Answer, Inquire, Conversation, Oral                                                                                                                                                                                     | “But for example, when I talk I can kind of give them tips and they can give me tips and I can write and then I can gaze at their laptop and then I can control and so and display.”                      | 35  | .99** | .99** | .99** |
| <i>MoR.Bodily</i>                    | Bodily conveyed modes of representation                                                               | Hand, gaze, move                                                                                                                                                                                                                             | For example, with the technology then with my gaze...I gaze at the monitor then, the mouse I can memorize, the keyboard I have to gaze at so that I press the right letter tangent.”                      | 22  | .99** | .96*  | .96*  |
| <i>MoR. Multimodal</i>               | MoR where multiple modes are foregrounded simultaneously                                              | Writ, talk, text, conversation, oral, describe                                                                                                                                                                                               | When the student talks and tries to reason about what the others are saying, the student writes at the same time and organizes the document automatically based on the division of assignment questions.” | 181 | .99** | .99** | .99** |
| <b>Activities</b>                    | <b>Activities salient in the learning setting in which students’ make meaning using technologies.</b> |                                                                                                                                                                                                                                              |                                                                                                                                                                                                           |     |       |       |       |
| <i>Activities. Consumption</i>       | Activities related mainly to consumption undertakings                                                 | Projected, projecting, view, select, explain, instruct, introduction, assignment, task, practice, watch, listen, read, delimit, share, display                                                                                               | “I might have wanted to go to studi.se and watch a movie and run a quiz and then maybe there are some good videoclips on YouTube as well.”                                                                | 118 | .98** | .99** | .99** |
| <i>Activities.Production</i>         | Activities related mainly to production undertakings                                                  | Type, erase, distance, activate, enclose, separate, add, inscribe, task, assignment, submit, tell, reason, insert, story, compose, practice, correct, writ, talk, describe, hand, answer, inquire, conversation, evaluate, discuss, creating | “So yes, for this with colors if you verify right or wrong it can be quite good because then you know that you were wrong on it and that you need to practice more on it.”                                | 192 | .99** | .95*  | .95*  |
| <i>Activities.Individual</i>         | Individually undertaken activities                                                                    | Story, watch, listen, individual, compose, read, quiet, practice, evaluate                                                                                                                                                                   | “I read the text to be able to write another part of it for the PowerPoint presentation.”                                                                                                                 | 78  | .99** | .99** | .99** |
| <i>Activities. Collaborative</i>     | Collaboratively undertaken activities                                                                 | Each other, collaboration, discuss, group, creating, tell, reason                                                                                                                                                                            | “And then there was group work and then you have to discuss in your group to get a good text together.”                                                                                                   | 51  | .99** | .96*  | .96*  |
| <i>Activities.Language</i>           | Language learning lesson                                                                              | English, Swedish                                                                                                                                                                                                                             | English and math. Eee... in science... we usually do not use it [Bingel.se] in but it is in science so you can.”                                                                                          | 14  | .99** | .94*  | .94*  |

Codebook

|                                                |                                                 |                                                                   |                                                                                                                                                                                                |    |       |       |       |
|------------------------------------------------|-------------------------------------------------|-------------------------------------------------------------------|------------------------------------------------------------------------------------------------------------------------------------------------------------------------------------------------|----|-------|-------|-------|
| <i>Activities.Swedish</i>                      | Content related to the subject Swedish          | Swedish                                                           | “In Swedish you would discuss and writing a text and it is quite good in the [Google] classroom because then you can submit and share and so in case you need or so.”                          | 13 | .99** | .99** | .99** |
| <i>Activities.Math</i>                         | Content related to the subject math.            | Math                                                              | “We usually mostly use it in mathematics and when we are going to sign up for the help record, then you sign up your name then the teacher comes and helps us in that order.”                  | 3  | .99** | .99** | .99** |
| <i>Activities.Social science</i>               | Content related to the subject social science   | Geography, mountain, map, Europe, country, earth, explore         | It has visibility and there are such stripes and so are the names and in the book it's just colors and a little darker nuance where the mountains are and stripes on what they are called.”    | 30 | .99** | .99** | .99** |
| <i>Activities.Science</i>                      | Content related to the subject science          | Nebula, supernova, experiment, weather, sun, meteorology, science | “I do not think there is such a huge difference because at science we have used because we would write about nebulae and such and supernovae, I do not think there is such a huge difference.” | 15 | .99** | .98** | .98** |
| <i>Activities.Aesthetic/practical subjects</i> | Content related to aesthetic/practical subjects | Sloyd, Physical education                                         | “Well, in sloyd there is one thing, because in the end when we have done it, we have to write down what we have done on the Sloydportfolio.nu, it is a website.”                               | 3  | .99** | .99** | .99** |

\*rho ≤ 0.05, \*\*rho < 0.01
